# Supplementary material for: Expression of Piwi protein MIWI2 defines a distinct population of multiciliated cells
Source: JCI journal article supplement (doi:10.1172/jci94639), 2017-09-17
Supplement: sd1 [file 1]

## **SUPPLEMENTARY MATERIAL**

### **MIWI2 expression defines a novel population of lung multiciliated cells**

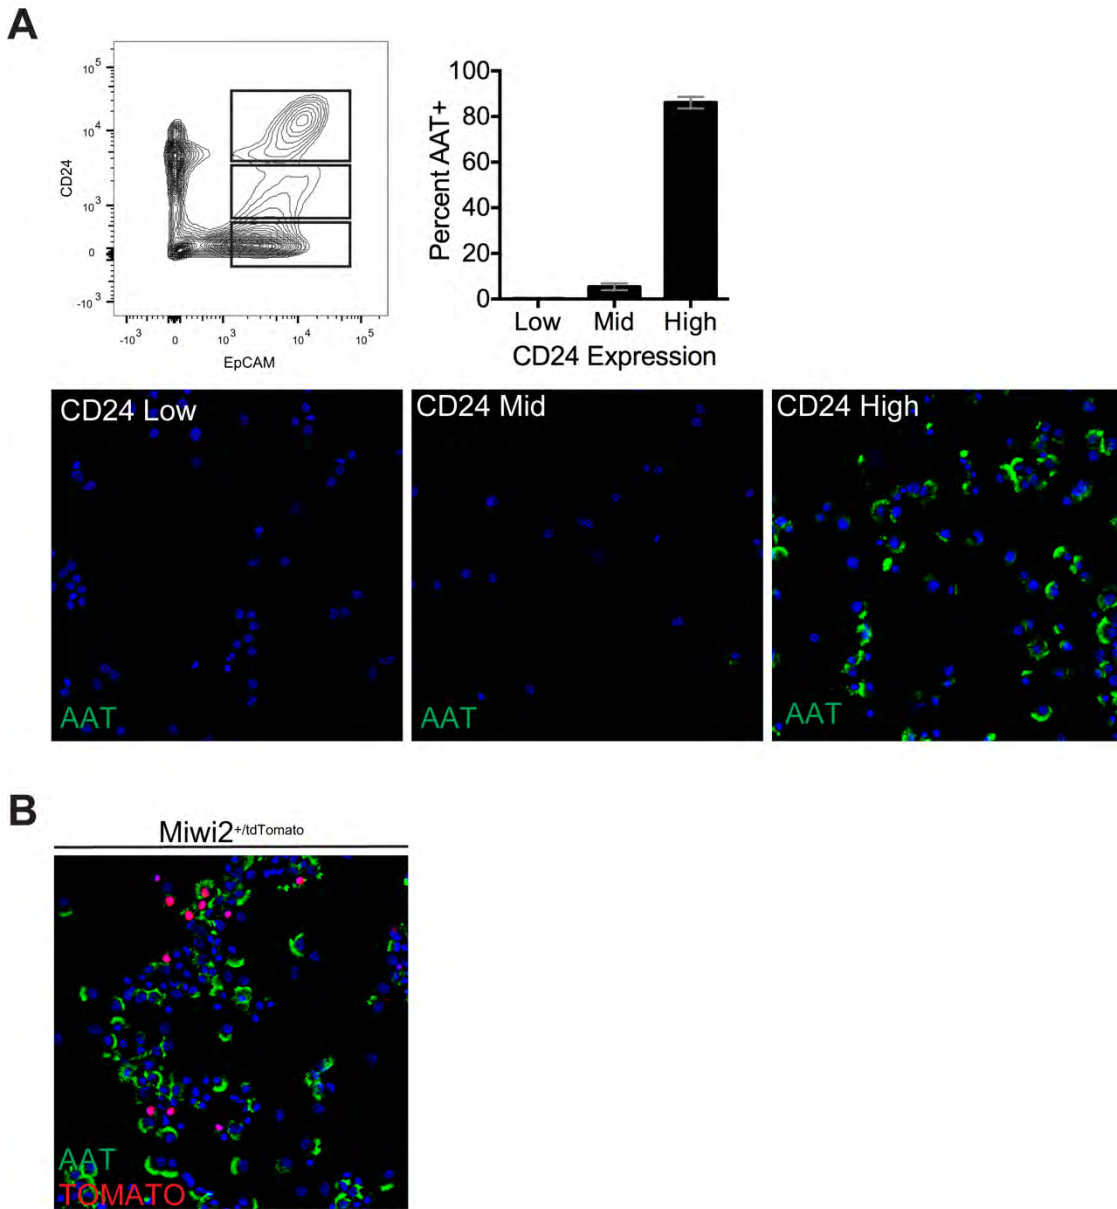

**Figure S1: FACS sorting of EpCAM<sup>+</sup>CD24<sup>Hi</sup> isolates multiciliated cells**

**(A)** Representative figure of ciliated cell isolation from single cell lung digest of C57BL/6 mice. Three populations of EpCAM<sup>+</sup> cells were isolated based on relative expression of CD24. Cytospins of sorted cells were immunostained with acetylated alpha tubulin (green) and quantified. **(B)** replication of (A) using *Miwi2*<sup>+/tdTomato</sup> mice, and immunostained for RFP (red) and acetylated alpha tubulin (green).

# SUPPLEMENTARY TABLE 1

**Table S1: RNA-seq read statistics**

| <b>File Name</b>        | <b>Group</b> | <b>Total<br/>sequences</b> | <b>Quality<br/>filtered<br/>reads</b> | <b>Percent<br/>uniquely<br/>mapping</b> |
|-------------------------|--------------|----------------------------|---------------------------------------|-----------------------------------------|
| Tomato1_S13_L002_R1_001 | MNAC         | 12,893,470                 | 12,808,488                            | 91.53%                                  |
| Tomato2_S14_L002_R1_001 | MPAC         | 13,385,605                 | 13,296,026                            | 90.32%                                  |
| Tomato3_S15_L002_R1_001 | MNAC         | 13,200,798                 | 12,992,423                            | 91.84%                                  |
| Tomato4_S16_L002_R1_001 | MPAC         | 13,966,510                 | 13,823,721                            | 92.00%                                  |
| Tomato5_S17_L002_R1_001 | MNAC         | 13,571,801                 | 13,518,920                            | 91.78%                                  |
| Tomato6_S18_L002_R1_001 | MPAC         | 13,072,568                 | 12,883,570                            | 91.73%                                  |

MPAC: MIWI2- Positive Airway Cell, MNAC: MIWI2- Negative Airway Cell
